# Supplementary material
Source: Royal Society of Chemistry journal article supplement (https://www.rsc.org/suppdata/an/1999/993/esi.doc)
Supplement: Supplementary file 1 [file esi.doc]

**Paper ref: 9/02251A/ANP Text document for ESI**

*A PROGRAM FOR THE WEIGHTED LINEAR LEAST SQUARE REGRESSION OF UNBALANCED RESPONSES ARRAYS.*

**TWO EXAMPLES OF ANALYSIS OF REAL CALIBRATION DATASETS.**

**Example N. 1**

Determination of Cr(VI) in the water extract of an in-house reference soil spiked with 100 ppm Cr(VI) after one week incubation at 60% field capacity.

The analysis was performed by adsorptive cathodic stripping voltammetry (AdCSV) at an ultratrace graphite electrode (UTGE) and by choosing the standard additions method.

The dataset contains only few responses (see Table 1.1).

| **Table 1.1 - AdCSV analysis of Cr(VI) at UTGE. The dataset.** | | |
| --- | --- | --- |
| *Concentration/ppb* | *Responses/nW* | |
| 0 | 1.479 | 1.644 |
| 5.0 | 7.544 | 8.084 |
| 10.0 | 13.41 | 13.95 |

The outputs of the program are summarised in Table 1.2.

| **Table 1.2 - AdCSV analysis of Cr(VI) at UTGE. Program outputs (= 0.05)** | |
| --- | --- |
| *Bartlett test* | homoscedastic |
| *lack-of-fit test* | linear |
| *outliers test* | no outliers |
| *Shapiro-Wilk test* | not applicable |
| *r2* | 0.9981 |
| *slope/nW.ppb-1* | 1.2230.075 |
| *intercept/nW* | 1.580.29 |
| *sample concentratio/ppb* | 1.290.21 |

Figure 1.1 shows the final plots.

Figure 1.1 - Calibration diagram obtained from data of Table 1.1; the upper plot displays original responses, weighted regression line and confidence band of interpolated values. The bottom plot displays weighted residuals and  sy/x and z(1-/2).sy/x bands (=0.05).

**Example N. 2: by courtesy of professor M. Taddia, Università degli Studi di Bologna (I)**

Determination of Indium in 0.24 M HNO3 by FAAS at 303.9 nm..

Data obtained by the calibration curve method are displayed in Table 2.1

| **Table 2.1 - FAAS analysis of Indium. The dataset.** | | | | | | |
| --- | --- | --- | --- | --- | --- | --- |
| *Concentration/ppb* | *Absorbance* | | | | | |
| 6.0 | 0.057 | 0.058 | 0.058 | 0.057 | 0.058 | m |
| 12.0 | 0.113 | 0.114 | 0.115 | 0.114 | 0.114 | m |
| 16.0 | 0.170 | 0.171 | 0.171 | 0.170 | 0.172 | 0.171 |
| 24.0 | 0.223 | 0.225 | 0.225 | 0.228 | 0.229 | 0.228 |
| 30.0 | 0.280 | 0.281 | 0.281 | 0.282 | 0.281 | m |

The outputs of the program are summarised in Table 2.2 and 2.3.

| **Table 2.2 - FAAS analysis of Indium. Program outputs (= 0.05)** | |
| --- | --- |
| *Bartlett test* | heteroscedastic |
| *lack-of-fit test* | not linear |
| *outliers test* | no outliers |
| *Shapiro-Wilk test* | negative |
| *r2* | 0.9998 |
| *slope/Abs units.ppb-1* | (933.65.2).10-5 |
| *intercept/ppb* | (1.840.84).10-3 |

| **Table 2.3 - FAAS analysis of Indium. Program outputs (= 0.01)** | |
| --- | --- |
| *Bartlett test* | homoscedastic |
| *lack-of-fit test* | linear |
| *outliers test* | no outliers |
| *Shapiro-Wilk test* | negative |
| *r2* | 0.9998 |
| *slope/Abs units.ppb-1* | (933.67.0).10-5 |
| *intercept/ppb* | (1.81.1).10-3 |

The reduction of the  risk from 0.05 (see Table 2.2) to 0.01 (see Table 2.3) allows to avoid heteroscedasticity and non-linearity.

The Shapiro-Wilk test was always negative. Likely, available data are not enough.

Figure 2.1 shows the final plots.

Figure 2.1 - Calibration diagram obtained from data of Table 2.1; the upper plot displays original responses, weighted regression line and confidence band of interpolated values. The bottom plot displays weighted residuals and  sy/x and z(1-/2).sy/x bands (=0.01).
